# Supplementary material for: Using CRISPR/Cas9 to Knock out Amylase in Acinar Cells Decreases Pancreatitis-Induced Autophagy
Source: Biomed Res Int. 2018 May 17;2018:8719397. doi: 10.1155/2018/8719397 (PMC5985122; doi:10.1155/2018/8719397)
Supplement: Supplementary 1 — Supplementary Figure 1: (A) Western blotting of normal state wild-type and ATG12-/- MIA PaCa-2 cell lysate. ATG12 formed a complex with ATG5. (B) Result of immunostaining. Green is LC3; blue is Hoechst. [file 8719397.f1.zip]

Archive with 2 entries (2 files):
- suppl 1a_BMRI_2253658.pptx
- suppl 1b_BMRI_2253659.pptx
