# Supplementary material for: Using CRISPR/Cas9 to Knock out Amylase in Acinar Cells Decreases Pancreatitis-Induced Autophagy
Source: Biomed Res Int. 2018 May 17;2018:8719397. doi: 10.1155/2018/8719397 (PMC5985122; doi:10.1155/2018/8719397)
Supplement: Supplementary 2 — Supplementary Figure 2: (A) Western blotting of lysate from wild-type and Atg12-/- AR42J. LC3-II is a marker of autophagy. (B) Results of immunostaining. Green is LC3; blue is Hoechst. (C) Results of cell viability measurement. [file 8719397.f2.zip]

Archive with 4 entries (4 files):
- supp 2C left_BMRI_2253663.pdf
- supp 2C right_BMRI_2253666.pdf
- suppl 2a_BMRI_2253660.pptx
- suppl 2b_BMRI_2253661.pptx
