# Supplementary material for: Using CRISPR/Cas9 to Knock out Amylase in Acinar Cells Decreases Pancreatitis-Induced Autophagy
Source: Biomed Res Int. 2018 May 17;2018:8719397. doi: 10.1155/2018/8719397 (PMC5985122; doi:10.1155/2018/8719397)
Supplement: Supplementary 3 — Supplementary Figure 3: (A, B) Results of cell viability measurement. (C) Table displaying the results of immunostaining. The total counted cells, total LC3 puncta counted, and % of cells with positive LC3 puncta are displayed. [file 8719397.f3.zip]

Archive with 5 entries (5 files):
- supp 3A left_BMRI_2253669.pdf
- supp 3A right_BMRI_2253674.pdf
- supp 3b left_BMRI_2253677.pdf
- supp 3b right_BMRI_2253680.pdf
- suppl 3C_BMRI_2253682.docx
