# Supplementary figures and images for: Using CRISPR/Cas9 to Knock out Amylase in Acinar Cells Decreases Pancreatitis-Induced Autophagy
Source: Hindawi journal article supplement (doi:10.1155/2018/8719397), 2018-01-01

# 100nM Cerulein cell viability

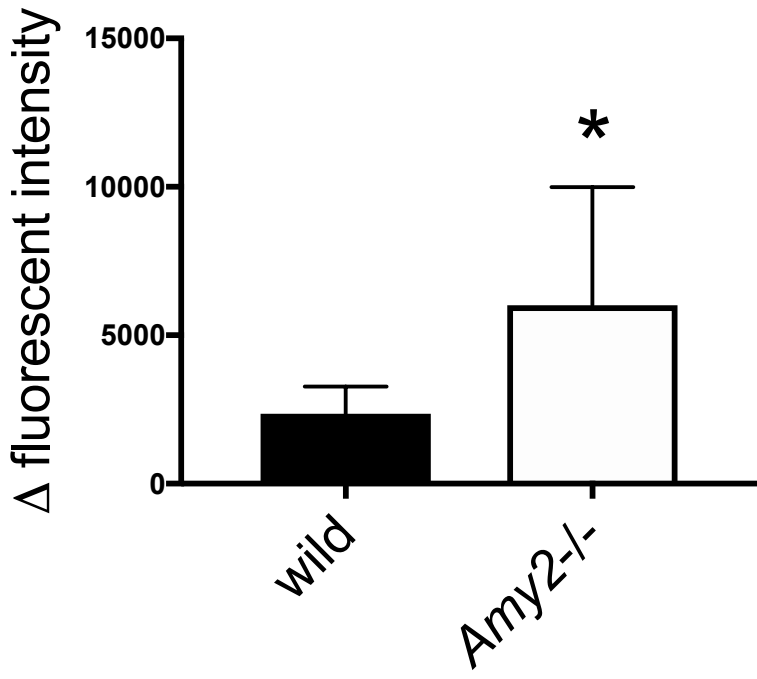

Supplement: f3 [file 8719397.f3.zip]

# 100nM Cerulein cell viability

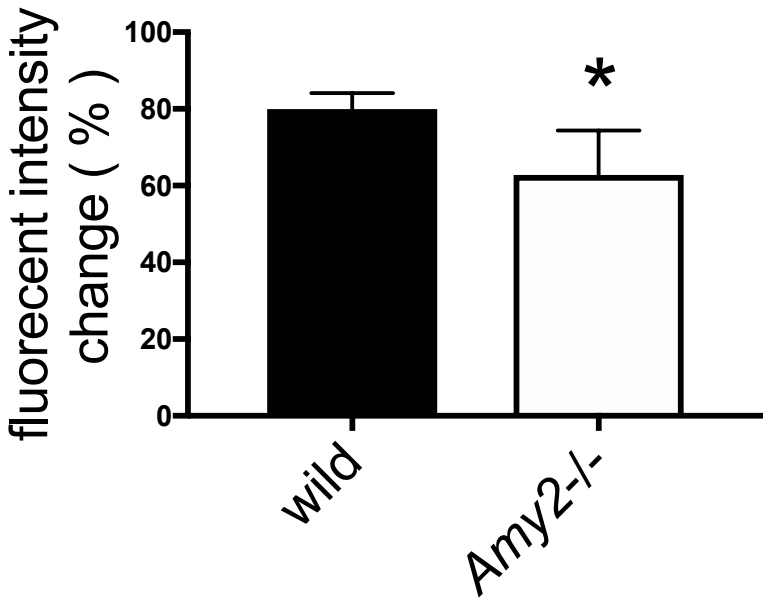

Supplement: f3 [file 8719397.f3.zip]

# 100nM Rapamycin cell viability

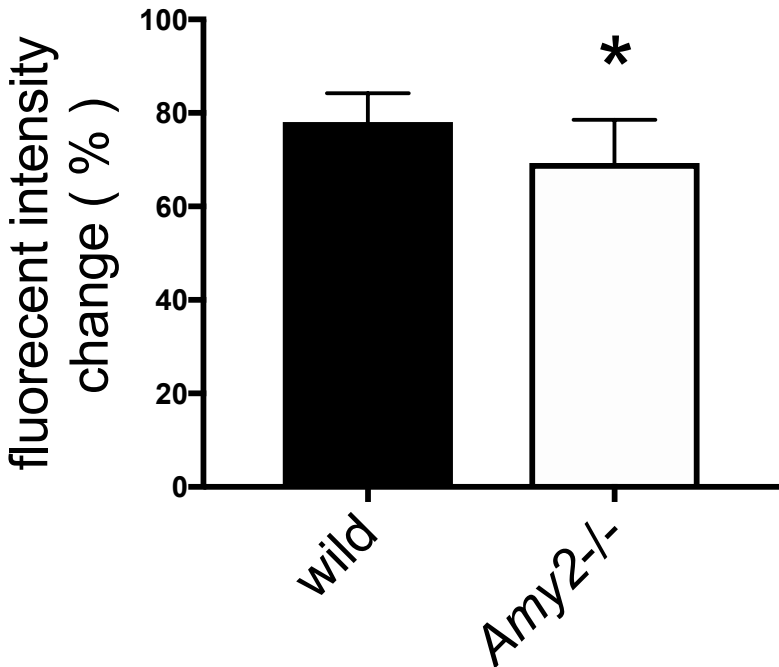

Supplement: f3 [file 8719397.f3.zip]

# 100nM Rapamycin cell viability

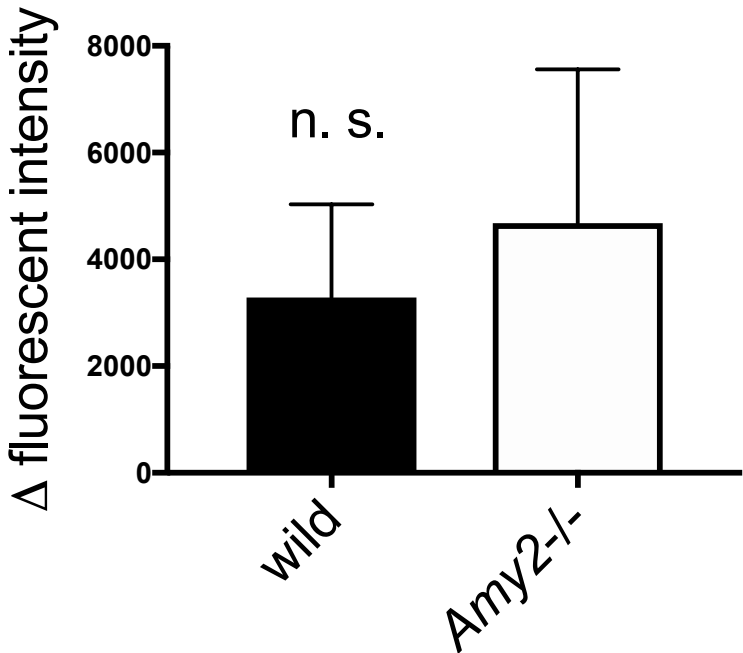

Supplement: f3 [file 8719397.f3.zip]

1hr starve  
cell viability

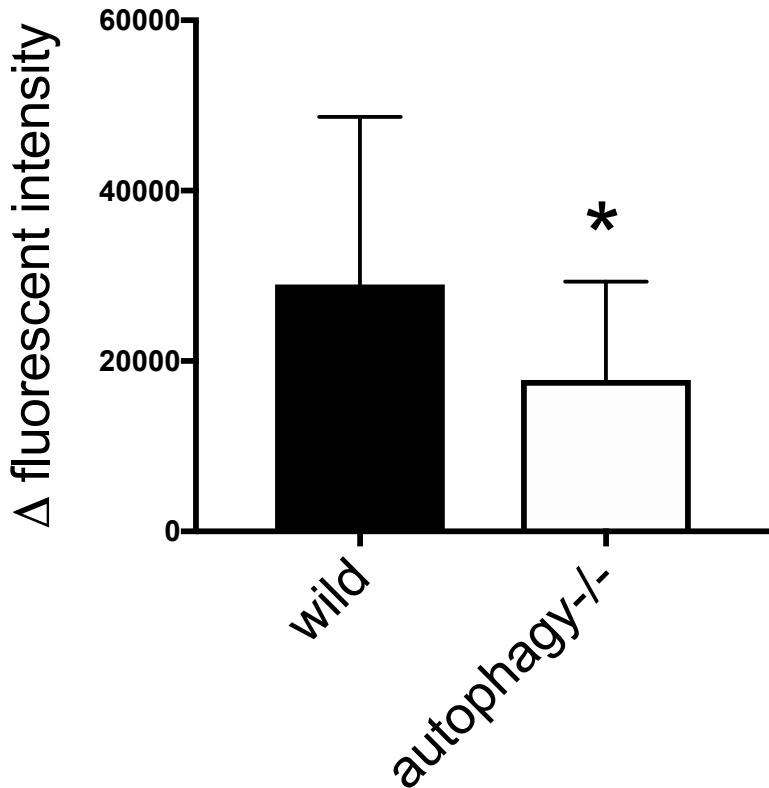

Supplement: f2 [file 8719397.f2.zip]

# 1hr starve cell viability

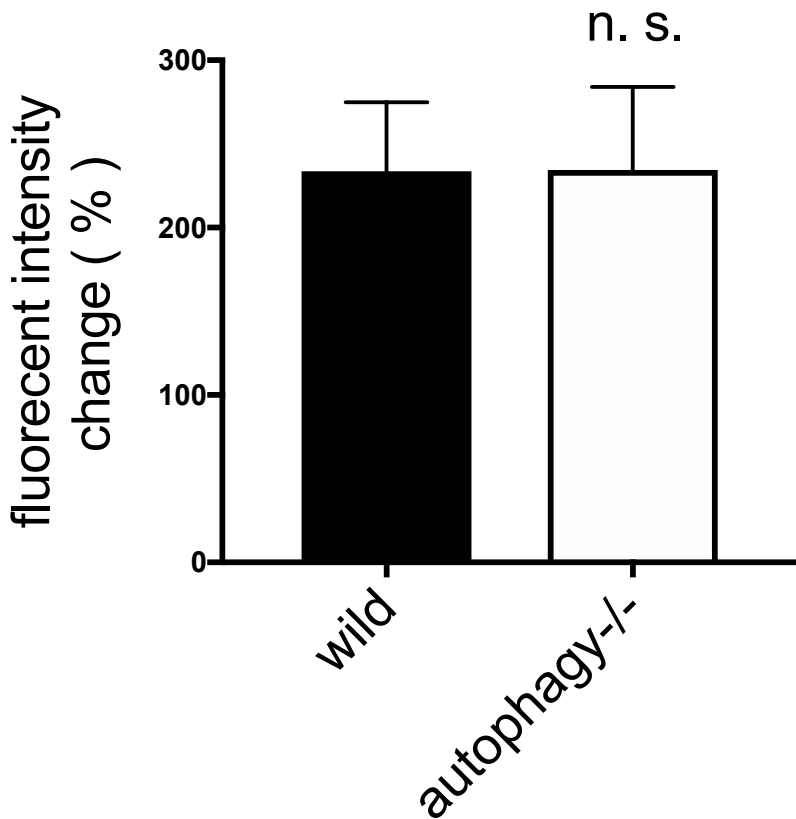

Supplement: f2 [file 8719397.f2.zip]
